# Supplementary material for: Co-transport of bentonite colloid and U(VI) in particulate granite column: role of colloid concentration, ionic strength, pH and flow rate
Source: publisher site journal article supplement (doi:10.1515/ract-2021-1096), 2022-01-21
Supplement: Supplementary file 1 [file j_ract-2021-1096_suppl.docx]

**Supplementary material**

**Co-transport of bentonite colloid and U(VI) in particulate granite column: Role of colloid concentration, ionic strength, pH and flow rate**

*Zhen Zhang a, Jiaxi Heng a, Qiang Jin a,b , Zongyuan Chen* *a,b,* ,* *Wangsuo Wu a,b Zhijun Guo* *a,b,**

*a Radiochemistry Laboratory, School of Nuclear Science and Technology, Lanzhou University, 730000 Lanzhou, P. R. China*

*b Frontiers Science Center for Rare Isotopes, Lanzhou University, 730000 Lanzhou, P. R. China*

*c The Key Laboratory of Special Function Materials and Structure Design, Ministry of Education, Lanzhou University, 730000 Lanzhou, P. R. China*

**Corresponding author. Tel.: +86 931 8913278; fax: +86 931 8913551
E-mail address: zychen@lzu.edu.cn, guozhj@lzu.edu.cn*

**Text S1:** Kinetics of U(VI) adsorption on Beishan granite and bentonite colloid

**Figure S1.** The XRD pattern of bentonite.

**Figure S2.** Kinetics of U(VI) adsorption on Beishan granite and bentonite colloid

**Text S1:** Kinetics of U(VI) adsorption on Beishan granite and bentonite colloid

Kinetic-type batch experiments were conducted to quantify U(VI) adsorption to particulate Beishan granite, 240 and 480 mg/L bentonite colloid. These batch experiments were run under the same conditions of ionic strength and pH as the column experiments. The adsorption experiment of U(VI) on Beishan granite was as follows: 100.0 g of 20-40 mesh particulate Beishan granite and 500.0 mL of 1.2×10-5 mol/L U(VI) solution were added into 1 L glass bottle, the ionic strength of the solution was 1mM NaCl and the pH was 6.45. The pH values of the suspension were adjusted by adding a negligible volume of HCl or NaOH solution. Then the glass bottle was placed on a shaker and set to shake at 140 rpm. At pre-determined time intervals (from a few minutes to 24 h), took a small amount of solution from a bottle with a syringe, promptly filtered through a 0.22 μm membrane filter, the concentration of U(VI) in the supernatant was analyzed by the method mentioned earlier.

Adsorption kinetics of U(VI) on 240 and 480 mg/L bentonite colloid were determined at pH 6.45 and *I*=1mM NaCl solution at different reaction times. The concentration of U(VI) was 1.2×10-5 mol/L. Suspensions were prepared and poured into a telfon bottle, then the bottle was placed on a shaker and set to shake at 60 rpm. At pre-determined time intervals, one sample was sacrificed for each experiment. The sample were centrifuged for 30 minutes at 15000 rpm, then promptly filtered through a 0.22 μm membrane filter. The concentration of U(VI) in the supernatant was analyzed and the adsorption percentage of U(VI) were calculated.

The adsorption percentage of U(VI) were calculated as:

where *C*0 is the initial concentration, *Ceq*(mol/L) is the aqueous concentration at equilibrium.

Measurements made in batch experiments showed that particulate Beishan granite did strongly adsorb U(VI). After 3h, the adsorption of U(VI) on particulate Beishan granite in experiments reached about 80%. U(VI) uptake by the colloid was fairly fast, nearing equilibrium within 3 hours. Besides, as the concentration of colloid increased, the adsorption percentage of U(VI) on bentonite colloid increased from 48% to 68% of U(VI).





**Figure S1.** The XRD pattern of bentonite.

Figure S2. Kinetics of U(VI) adsorption on Beishan granite and bentonite colloid. The solid-to-solution ratio was 200 g/L for Beishan granite. The concentrations of bentonite colloid were 240 and 480 mg/L, respectively. CU(VI)=1.2×10-5mol/L, pH=6.45, I=0.001M NaCl
